# Supplementary material for: Simultaneous Removal of Cu2+, Cd2+ and Pb2+ by Modified Wheat Straw Biochar from Aqueous Solution: Preparation, Characterization and Adsorption Mechanism
Source: MDPI journal article supplement (doi:10.3390/toxics10060316), 2022-06-10
Supplement: s1 [file s1]

## **Supplementary Materials**

### **1. The detailed modification process of HNC**

20 g of BC was stirred in 2 mol/L KOH solution [1:10 (g/mL)] in a shaking bath at 80 °C and 220 rpm for 4 h, and then repeatedly washed with deionized water to neutral. Afterwards, 1 mol/L HNO<sub>3</sub> [1:10 (g/mL)] was added, stirred in a shaking bath at 80 °C and 220 rpm for 4 h, then washed repeatedly with deionized water to neutral. Finally, ammonia solution 5% (w/w) (1:10 (g/mL)) was added, stirred at 50 °C and at 220 rpm for 4h, and then washed repeatedly with deionized water until neutral.

### **2. Experimental conditions of the batch adsorption experiments under the monometal system**

**Effect of initial pH:** initial pH=1.5, 2.5, 3.5, 4.5, 5.5 and 6.5, the dosages at 2 g/L for Cu<sup>2+</sup> and Cd<sup>2+</sup>, and 1 g/L for Pb<sup>2+</sup>, reaction time 240 min, temperature 298.15 K, substrate concentration 50 mg/L

**Effect of BC and HNC dosage:** initial pH=5.5, the dosages 0.4, 1.0, 2.0, 4.0, 8.0 g/L, reaction time 240 min, temperature 298.15 K, substrate concentration 50 mg/L

**Adsorption kinetics:** initial pH=5.5, the dosages at 2 g/L for Cu<sup>2+</sup> and Cd<sup>2+</sup>, and 1 g/L for Pb<sup>2+</sup>, reaction time 0, 5, 10, 15, 20, 30, 40, 60, 90, 120, 240 and 360 min, temperature 298.15 K, substrate concentration 50 mg/L

**Adsorption isotherms:** initial pH=5.5, the dosages at 2g/L for Cu<sup>2+</sup> and Cd<sup>2+</sup>, and 1g/L for Pb<sup>2+</sup>, reaction time 240 min, temperature 288.15, 298.15 and 308.15K, substrate concentration 0, 20, 50, 100, 200, 500, 800, 1000, 1200 mg/L

**Table S1** Isotherm parameters for the adsorption of Cu<sup>2+</sup>, Cd<sup>2+</sup> and Pb<sup>2+</sup> by BC and HNC

| Temperature<br>(K) | Adsorption<br>isotherm | Parameter                       | Cu <sup>2+</sup> |        | Cd <sup>2+</sup> |        | Pb <sup>2+</sup> |        |
|--------------------|------------------------|---------------------------------|------------------|--------|------------------|--------|------------------|--------|
|                    |                        |                                 | BC               | HNC    | BC               | HNC    | BC               | HNC    |
| 288.15             | Langmuir               | $q_{max}$ (mg/g)                | 9.76             | 23.53  | 16.63            | 36.22  | 60.79            | 136.05 |
|                    |                        | $K_L$ (L/mg)                    | 0.017            | 0.104  | 0.045            | 0.071  | 0.032            | 0.023  |
|                    |                        | $R^2$                           | 0.9911           | 0.9986 | 0.9989           | 0.9988 | 0.9965           | 0.9846 |
|                    | Freundlich             | $K_F(\text{mg/g (L/mg)}^{1/n})$ | 3.16             | 12.22  | 5.96             | 14.32  | 20.86            | 52.46  |
|                    |                        | $1/n$                           | 0.150            | 0.099  | 0.152            | 0.142  | 0.153            | 0.123  |
|                    |                        | $R^2$                           | 0.9022           | 0.9452 | 0.9447           | 0.9328 | 0.9831           | 0.9026 |
|                    | Temkin                 | $A$                             | 6.4              | 2344   | 12.0             | 170.2  | 50.8             | 46.3   |
|                    |                        | $B$                             | 2367             | 1488   | 1358             | 798.2  | 451.9            | 209.7  |
|                    |                        | $R^2$                           | 0.8528           | 0.9517 | 0.9573           | 0.9804 | 0.9537           | 0.8644 |
|                    | Langmuir               | $q_{max}$ (mg/g)                | 15.95            | 27.62  | 16.93            | 39.56  | 93.55            | 158.73 |
|                    |                        | $K_L$ (L/mg)                    | 0.040            | 0.112  | 0.064            | 0.055  | 0.021            | 0.021  |
|                    |                        | $R^2$                           | 0.9967           | 0.9984 | 0.9991           | 0.9984 | 0.9838           | 0.9731 |
| 298.15             | Freundlich             | $K_F(\text{mg/g (L/mg)}^{1/n})$ | 6.84             | 12.93  | 4.90             | 18.16  | 28.87            | 65.17  |
|                    |                        | $1/n$                           | 0.120            | 0.118  | 0.191            | 0.113  | 0.161            | 0.112  |
|                    |                        | $R^2$                           | 0.9183           | 0.9369 | 0.7131           | 0.9417 | 0.9373           | 0.9216 |
|                    | Temkin                 | $A$                             | 52.7             | 556.6  | 3.3              | 431.3  | 25.8             | 104.2  |
|                    |                        | $B$                             | 1734.0           | 1164.8 | 1134.7           | 832.5  | 297.4            | 203.6  |
|                    |                        | $R^2$                           | 0.8768           | 0.9594 | 0.7488           | 0.944  | 0.9150           | 0.8090 |
|                    | Langmuir               | $q_{max}$ (mg/g)                | 17.04            | 31.06  | 38.37            | 58.48  | 96.90            | 161.29 |
|                    |                        | $K_L$ (L/mg)                    | 0.075            | 0.040  | 0.007            | 0.026  | 0.021            | 0.032  |
|                    |                        | $R^2$                           | 0.9975           | 0.9875 | 0.9241           | 0.9935 | 0.9823           | 0.9895 |
|                    | Freundlich             | $K_F(\text{mg/g (L/mg)}^{1/n})$ | 9.58             | 13.23  | 4.19             | 20.11  | 30.41            | 59.31  |
|                    |                        | $1/n$                           | 0.086            | 0.125  | 0.297            | 0.144  | 0.158            | 0.138  |
|                    |                        | $R^2$                           | 0.6826           | 0.9204 | 0.9187           | 0.9570 | 0.9438           | 0.9685 |
| 308.15             | Freundlich             | $A$                             | 5256.4           | 301.7  | 0.2              | 32.9   | 19.5             | 31.6   |
|                    |                        | $B$                             | 2313             | 1067   | 414.0            | 496.0  | 286.9            | 175.7  |
|                    |                        | $R^2$                           | 0.6066           | 0.9051 | 0.8156           | 0.8819 | 0.9223           | 0.9152 |
|                    | Temkin                 | $A$                             | 5256.4           | 301.7  | 0.2              | 32.9   | 19.5             | 31.6   |
|                    |                        | $B$                             | 2313             | 1067   | 414.0            | 496.0  | 286.9            | 175.7  |

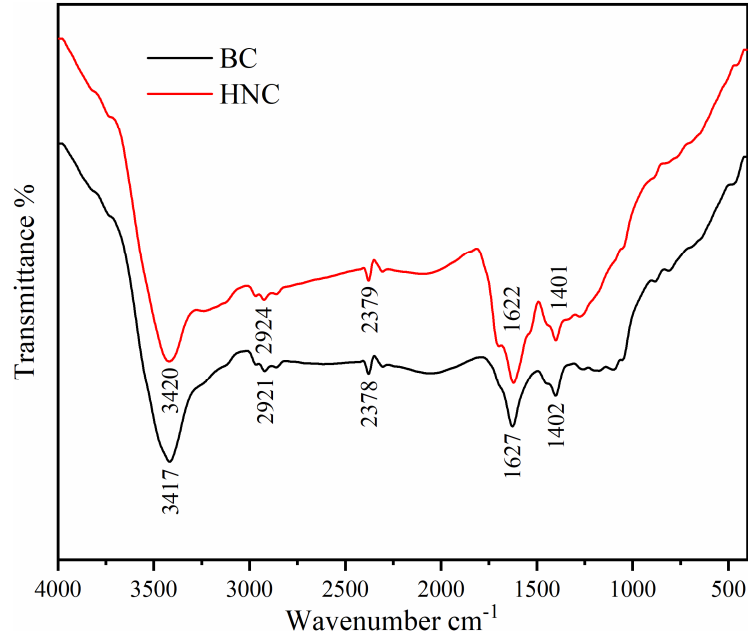

**Fig.S1** FT-IR spectra of BC and HNC

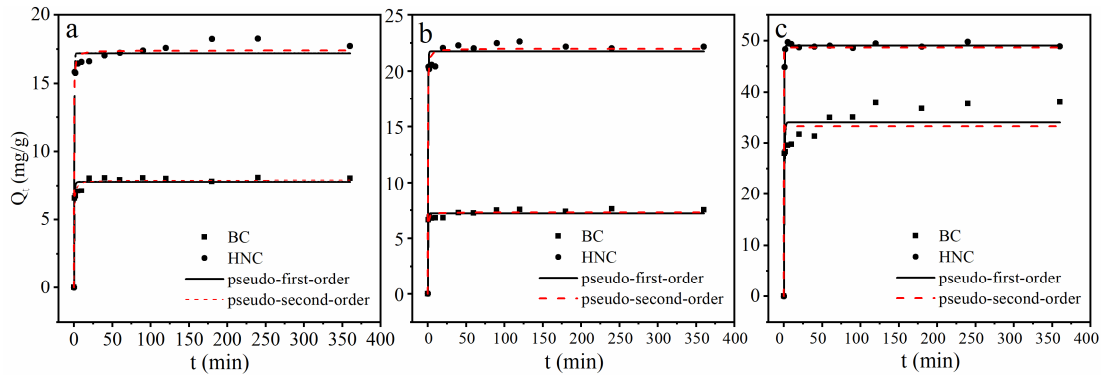

**Fig.S2** Pseudo-first-order kinetic and pseudo-second-order kinetic fitting of  $\text{Cu}^{2+}$  (a),  $\text{Cd}^{2+}$  (b) and  $\text{Pb}^{2+}$  (c) adsorption by BC and HNC, dosage of 2 g/L for  $\text{Cu}^{2+}$  and  $\text{Cd}^{2+}$ , and 1 g/L for  $\text{Pb}^{2+}$ , pH 5.5, initial concentration of  $\text{Cu}^{2+}$ ,  $\text{Cd}^{2+}$  and  $\text{Pb}^{2+}$  50 mg/L, and temperature 298.15K
